# Supplementary material
Source: PubMed Central journal article supplement (PMC10733405)

Figure 2E

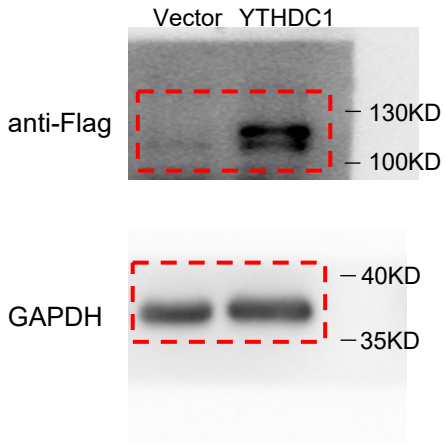

Figure 2H

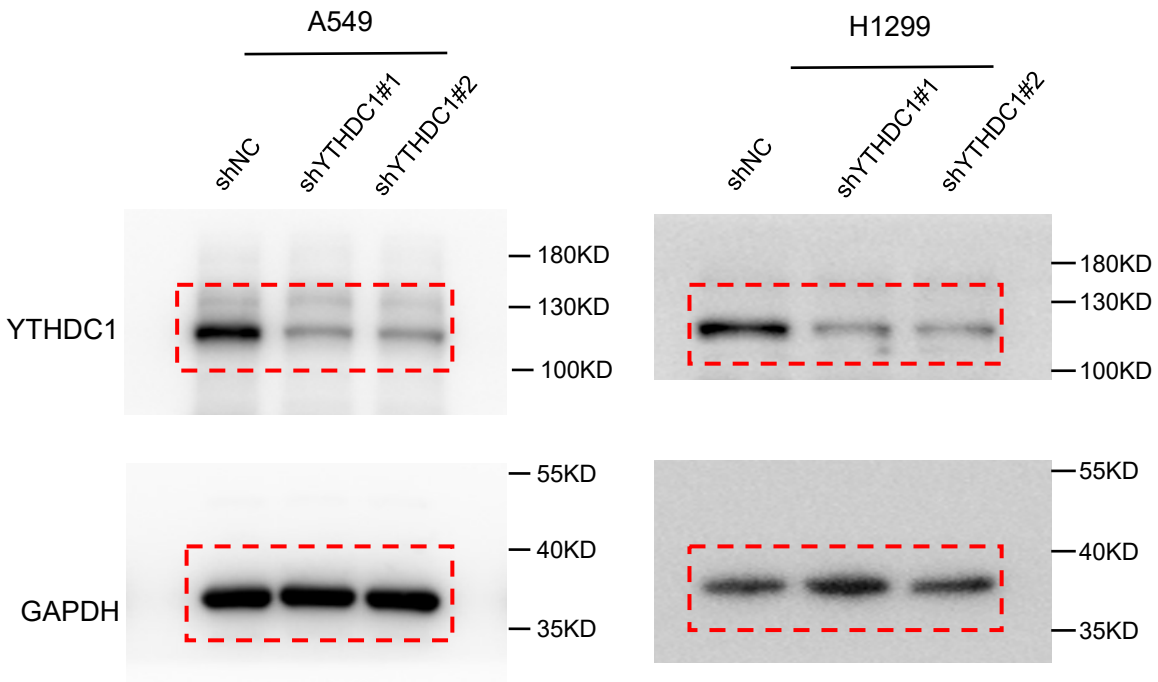

Figure 4C

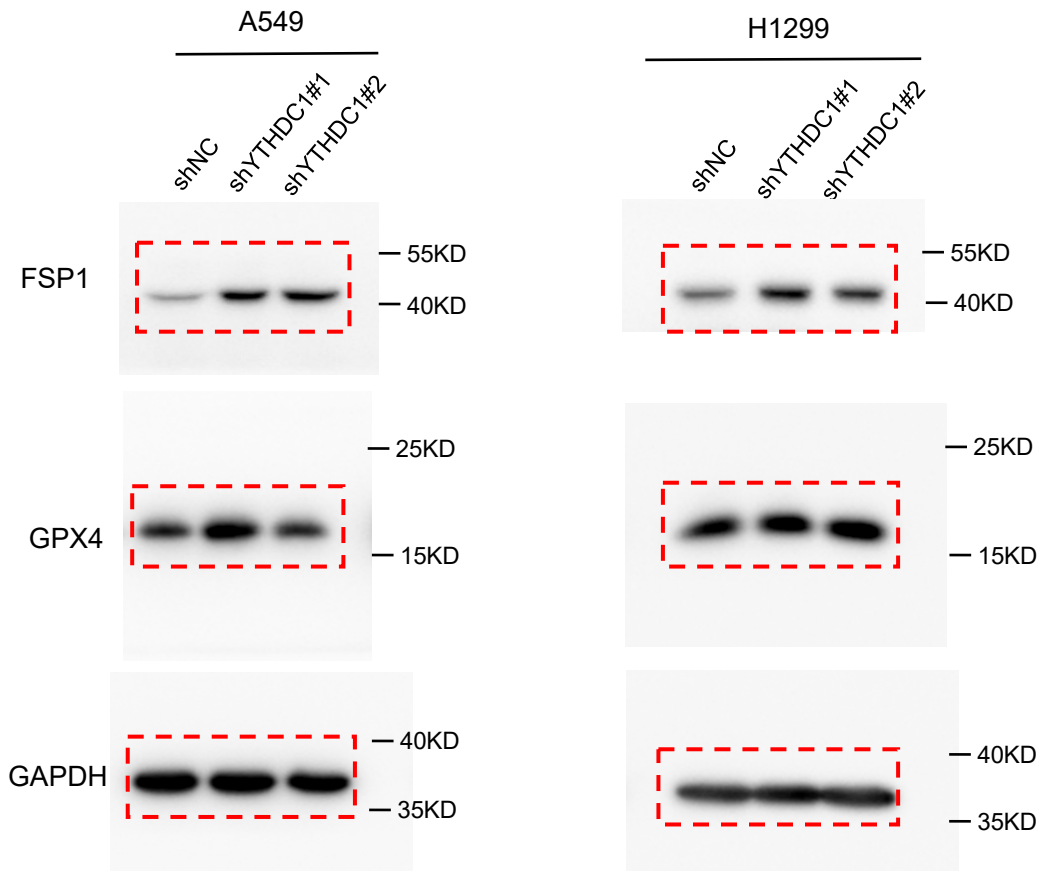

Figure 4G

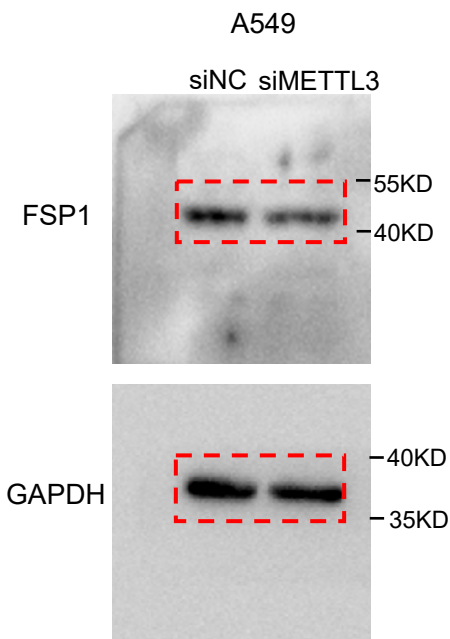

Figure 4H

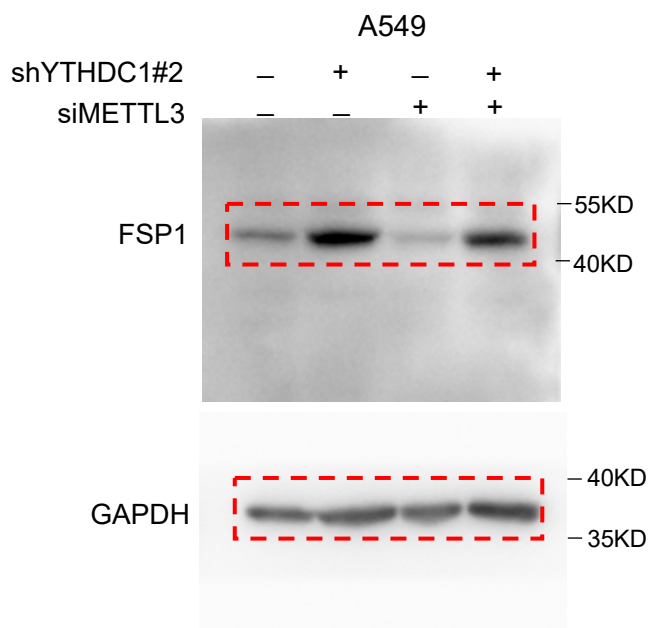

Figure 5B

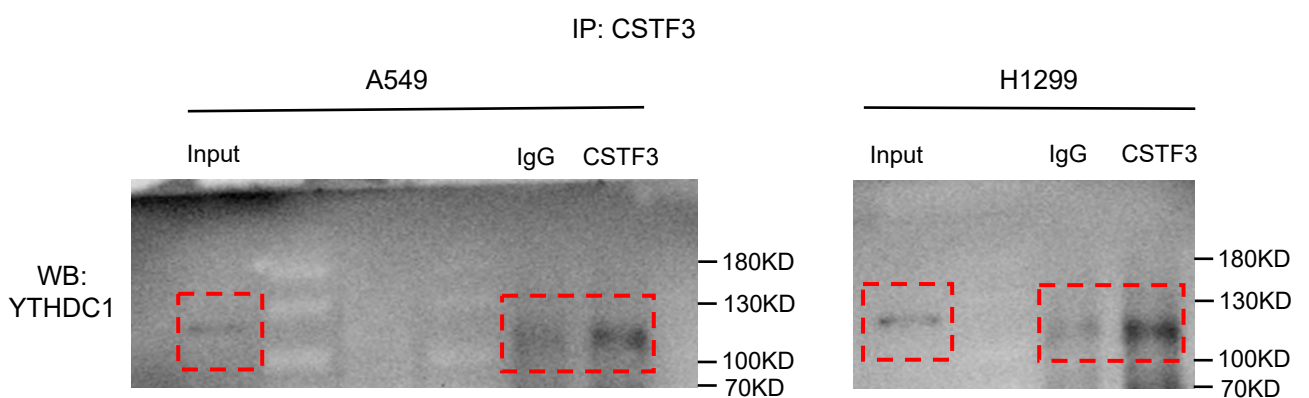

Figure 5G

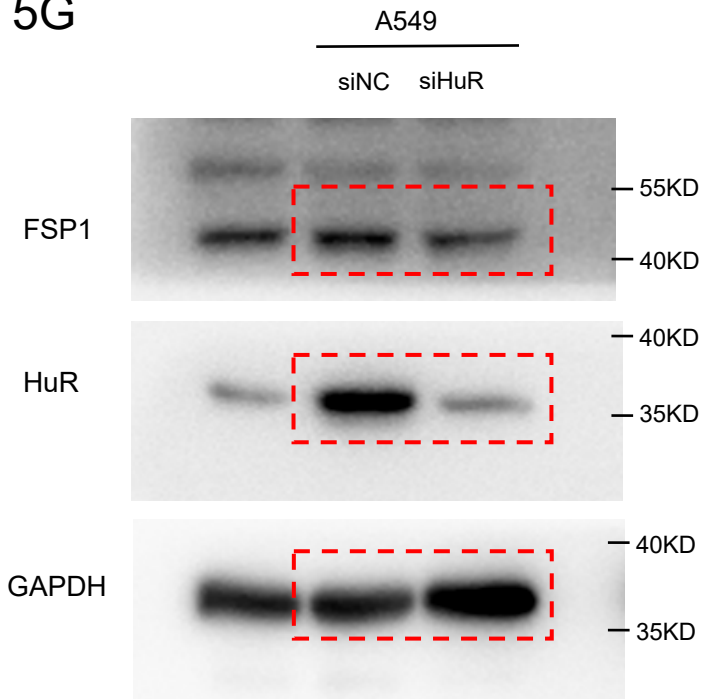

Figure 5I

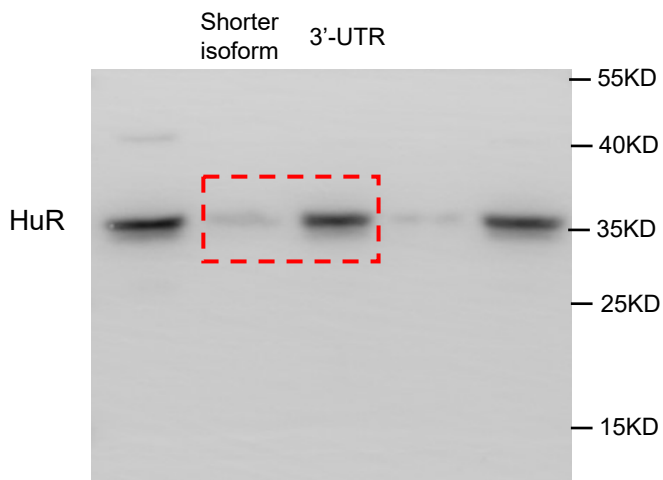

Figure 5J

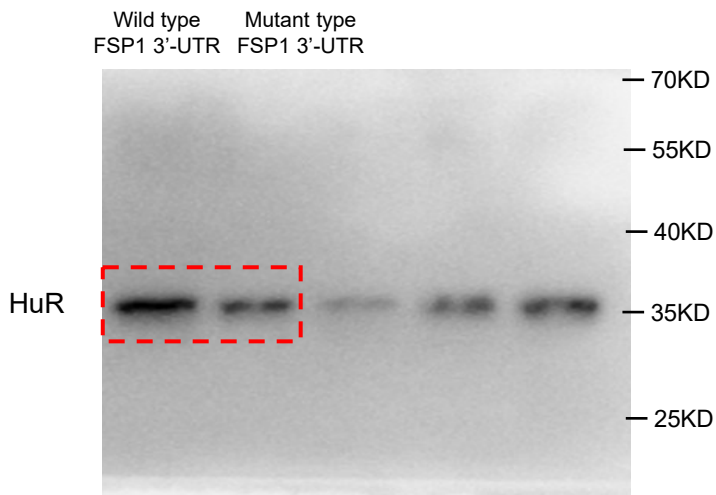

Figure S5A

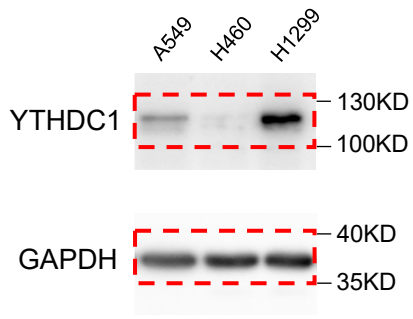

Figure S5F

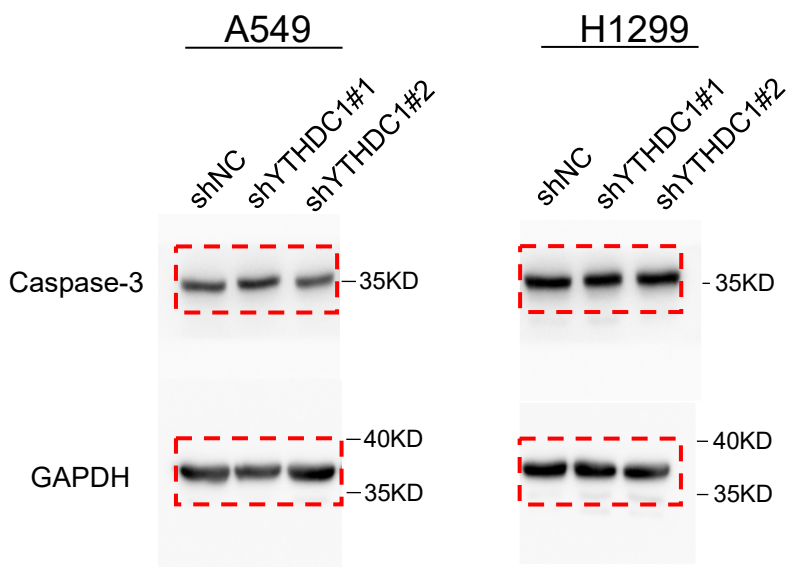

Figure S6D

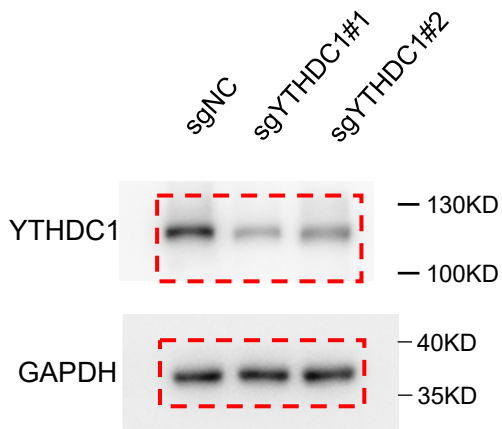

Figure S7B

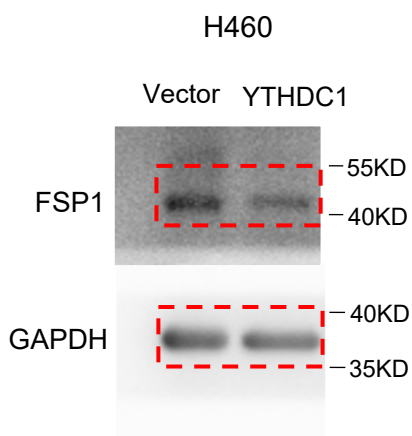

Figure S9C

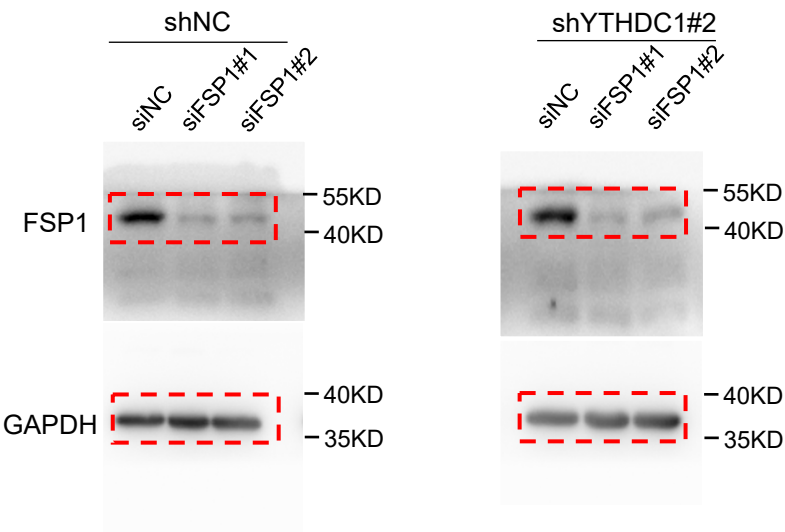

Figure S9D

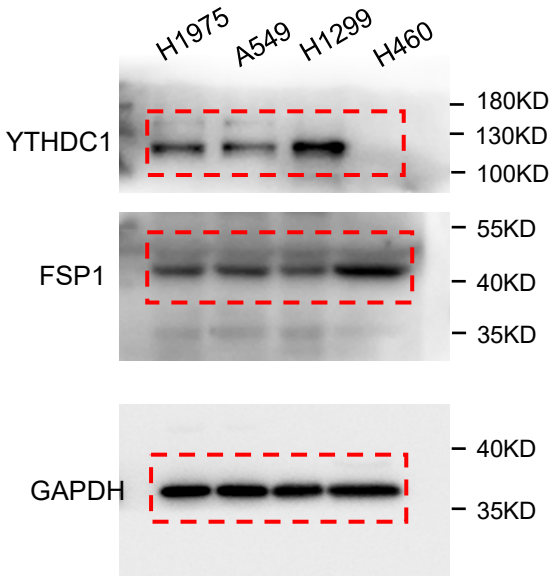

Supplement: 41418_2023_1234_MOESM2_ESM.pdf [file 41418_2023_1234_MOESM2_ESM.pdf]
